# Supplementary material for: Porous silver coating fiber for rapidly screening organotin compounds by solid phase microextraction coupled with surface enhanced Raman spectroscopy
Source: Royal Society of Chemistry journal article supplement (doi:10.1039/c6ra25491h), 2017-01-01
Supplement: c6ra25491h1.pdf [file c6ra25491h1.pdf]

### Supporting Information

#### **Porous silver coating fiber for rapidly screening organotin compounds by solid phase microextraction coupled with surface enhanced Raman spectroscopy**

Zhen Liu,<sup>a</sup> Le Wang,<sup>b</sup> Weiwei Bian,<sup>a, c</sup> Min Zhang<sup>a</sup> and Jinhua Zhan<sup>\*, a</sup>

<sup>a</sup> Key Laboratory of Colloid and Interface Chemistry, Ministry of Education, Department of Chemistry, Shandong University, Jinan 250100, China

<sup>b</sup> Center of Technology, Jinan Entry-Exit Inspection and Quarantine Bureau of the People's Republic of China, Jinan 250014, China.

<sup>c</sup> Department of Pharmacy, Weifang Medical University, Weifang 261053, China.

\*Address for correspondence. Email: [jhzhan@sdu.edu.cn](mailto:jhzhan@sdu.edu.cn)

Phone:86-531-88365017; Fax:86-531-88366280

Table S1 Assignment of SERS characteristic bands for OTCs

| Assignment                               | <b>TMT</b>            | <b>TBT</b>                                            | <b>TPhT</b>                                        |
|------------------------------------------|-----------------------|-------------------------------------------------------|----------------------------------------------------|
| $\nu_s(\text{Sn-Cl})$                    |                       |                                                       | $417\text{ cm}^{-1}$                               |
| $\nu_s(\text{SnC3})$                     | $507\text{ cm}^{-1}$  | $501\text{ cm}^{-1}$                                  |                                                    |
| $\nu_{as}(\text{SnC3})$                  | $554\text{ cm}^{-1}$  |                                                       |                                                    |
| $\nu(\text{Sn-C})$                       |                       |                                                       | $659\text{ cm}^{-1}$                               |
| <i>a meta substituent of phenyl ring</i> |                       |                                                       | $687\text{ cm}^{-1}$                               |
| $\nu_{s+as}$ ( phenyl ring breathing )   |                       |                                                       | $999\text{ cm}^{-1}$                               |
| $\nu(\text{C-phenyl})$                   |                       |                                                       | $1023\text{ cm}^{-1}$                              |
| $\delta(\text{CH}_3)$                    | $1193\text{ cm}^{-1}$ | $1042\text{ cm}^{-1}$ $1147\text{ cm}^{-1}$<br>$1177$ | $1071\text{ cm}^{-1}$ $1183\text{ cm}^{-1}$<br>$1$ |
| $\nu(\text{C-C})$                        |                       | $1410\text{ cm}^{-1}$ $1440\text{ cm}^{-1}$           | $1474\text{ cm}^{-1}$                              |
| $\nu(\text{C=C})$                        |                       |                                                       | $1573\text{ cm}^{-1}$                              |

Table S2 Adsorption equilibrium constant ( $k_e$ ) at a different temperature

|      | $k_e$ ( $L \cdot \mu\text{mol}^{-1}$ ) |       |       |
|------|----------------------------------------|-------|-------|
|      | 25 °C                                  | 35 °C | 45 °C |
| TMT  | 1.60                                   | 1.07  | 0.61  |
| TBT  | 30.47                                  | 8.47  | 4.96  |
| TPhT | 21.02                                  | 16.62 | 11.07 |

Table S3 Comparison of the analytical performance of with ICP-MS methods for determination of OTCs in textile matrix

|      | SPME-SERS                 |          |      | ICP-MS                    |          |      |
|------|---------------------------|----------|------|---------------------------|----------|------|
|      | $C_w$ ( $\mu\text{g/L}$ ) | Recovery | RSD  | $C_w$ ( $\mu\text{g/L}$ ) | Recovery | RSD  |
| TMT  | 202.2                     | 101.4%   | 7.5% | 212.9                     | 106.8%   | 2.3% |
| TBT  | 32.1                      | 98.5%    | 4.7% | 35.6                      | 109.5%   | 1.7% |
| TPhT | 12.5                      | 97.9%    | 5.2% | 12.4                      | 96.7%    | 1.4% |

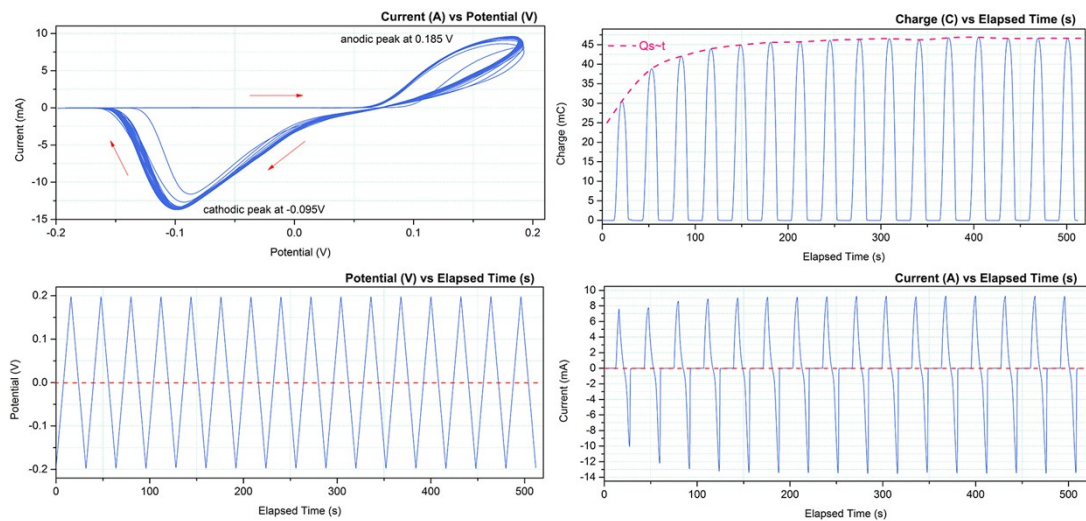

Fig. S1 Cyclic voltammogram of Ag silver wires in 0.1 M HCl scanning from -0.2 V to +0.2V at rate of 25 mV/s for 15 cycles, the silver wires, silver bucket, SCE were employed as the working, counter and reference electrodes, respectively.

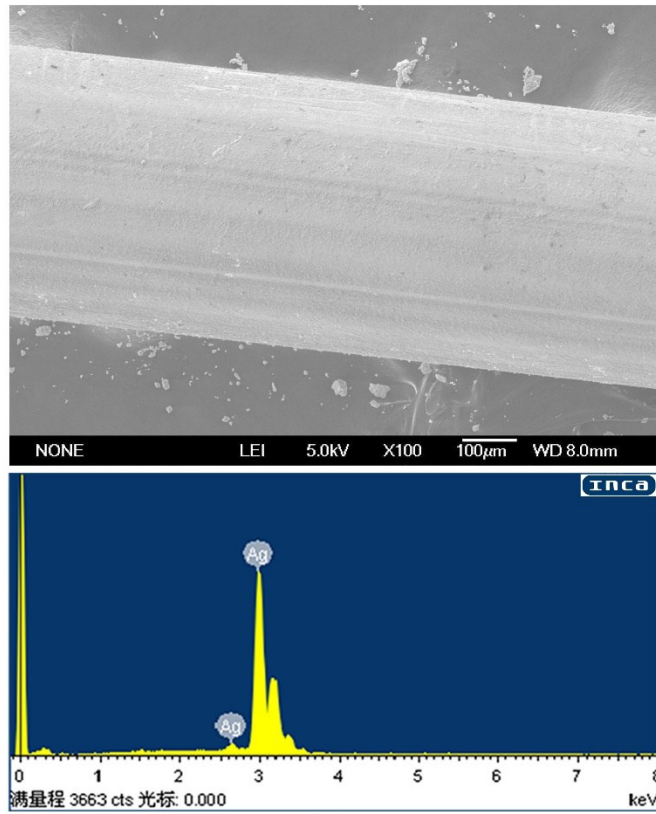

Fig. S2 The selected region for analysis and the corresponding EDS spectrum

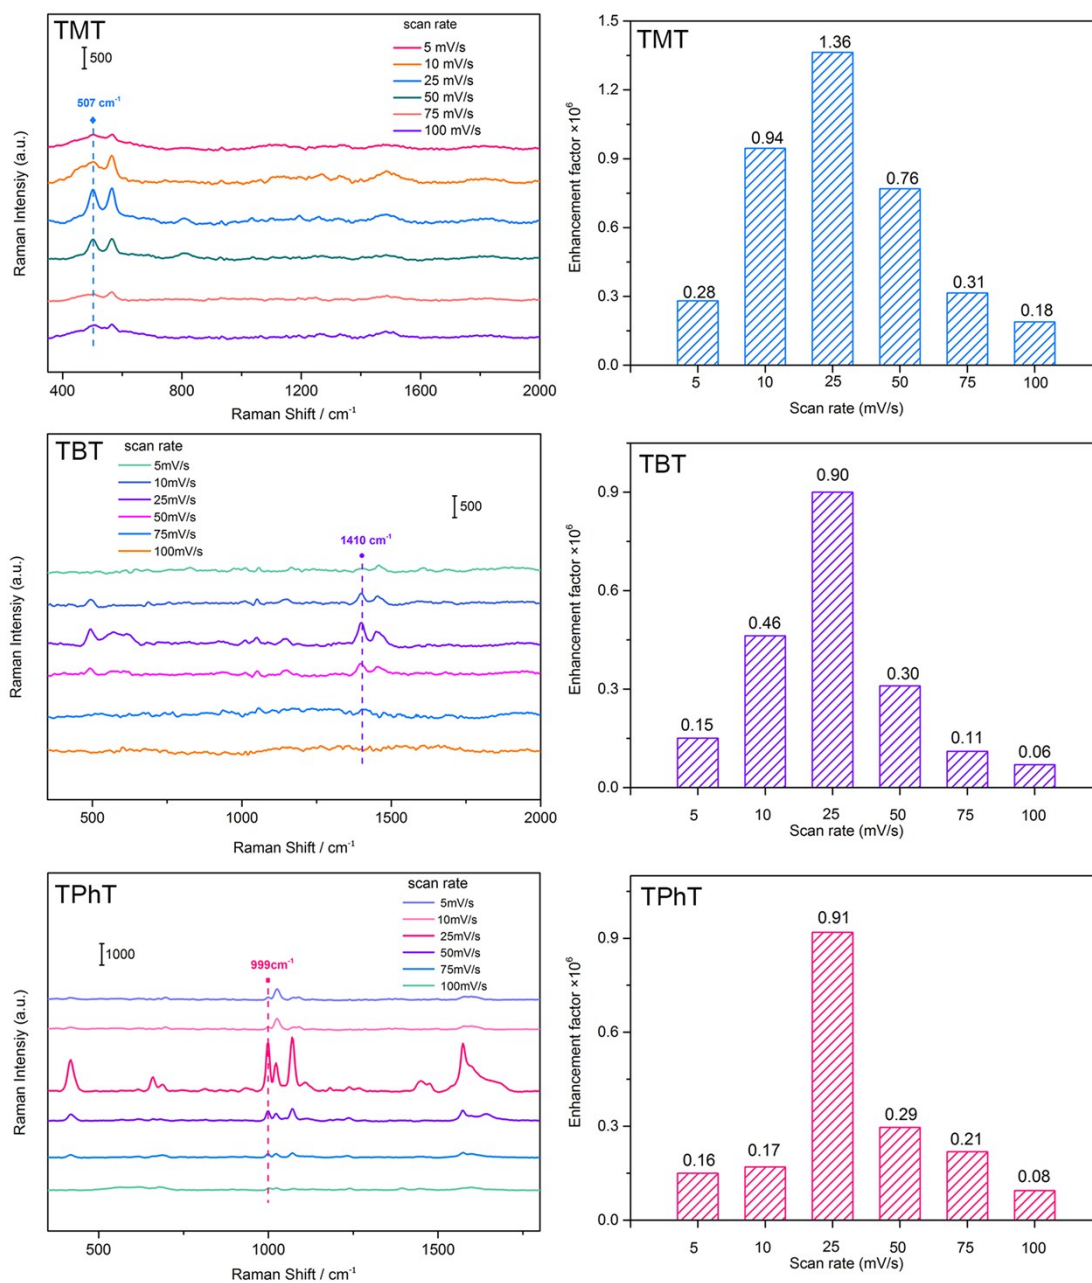

Fig. S3 SERS spectra of OTCs on porous Ag fiber prepared at different at different scan rate and corresponding enhancement factor.

The enhancement factor (EF) of porous Ag layer was calculated as following:

$$EF = \frac{I_{SERS}}{I_{Raman}} \times \frac{C_{Raman}}{C_{SERS}}$$

$I_{SERS}$  is the characteristic band intensity of molecule on porous Ag,  $I_{Raman}$  is the Raman intensity of solid powder,  $C_{Raman}$  is the concentration of OTCs solution.  $C_{Raman}$  is the activity of solid powder, the value is 1 in this condition. The characteristic bands were selected at 554  $\text{cm}^{-1}$ , 1410  $\text{cm}^{-1}$ , 999  $\text{cm}^{-1}$  for TMT, TBT and TPhT, respectively.

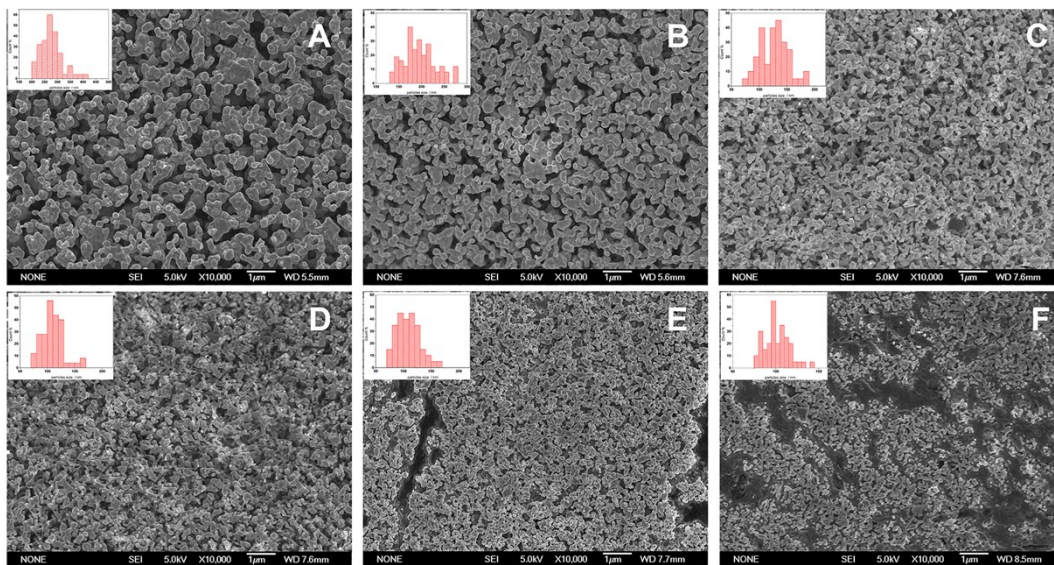

Fig. S4 SEM images of porous Ag layer prepared at different scan rate: (A) 5 mV/s, (B) 10 mV/s, (C) 25 mV/s, (D) 50 mV/s, (E) 75 mV/s, (F) 100 mV/s, the insert plot was the histogram of particles size.

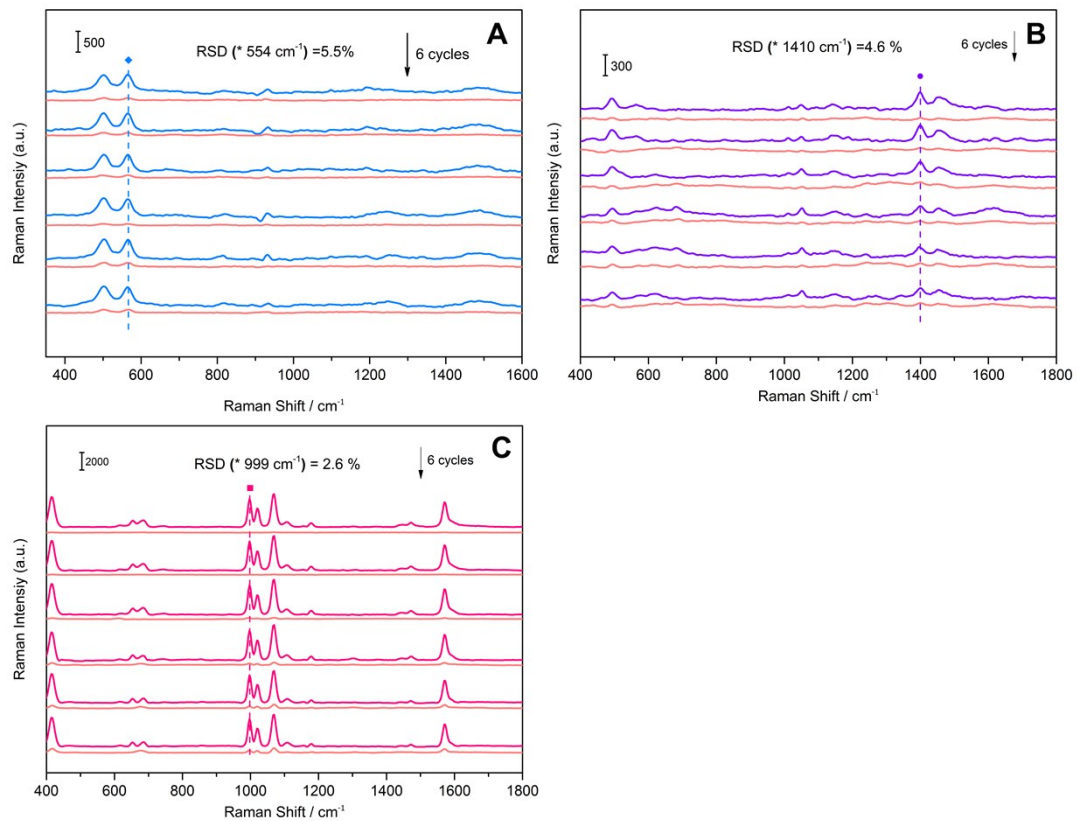

Fig. S5 The reproducibility of porous Ag fibers in six cycles for (A) TMT, (B) TBT and (C) TPHT, the dark color described the SERS after extraction, the light color described that after elution. The extraction was performed in solution for 100 min to reach equilibrium, the elution was performed by ultrasonic cleaning the porous Ag fiber for 1min in menthol.



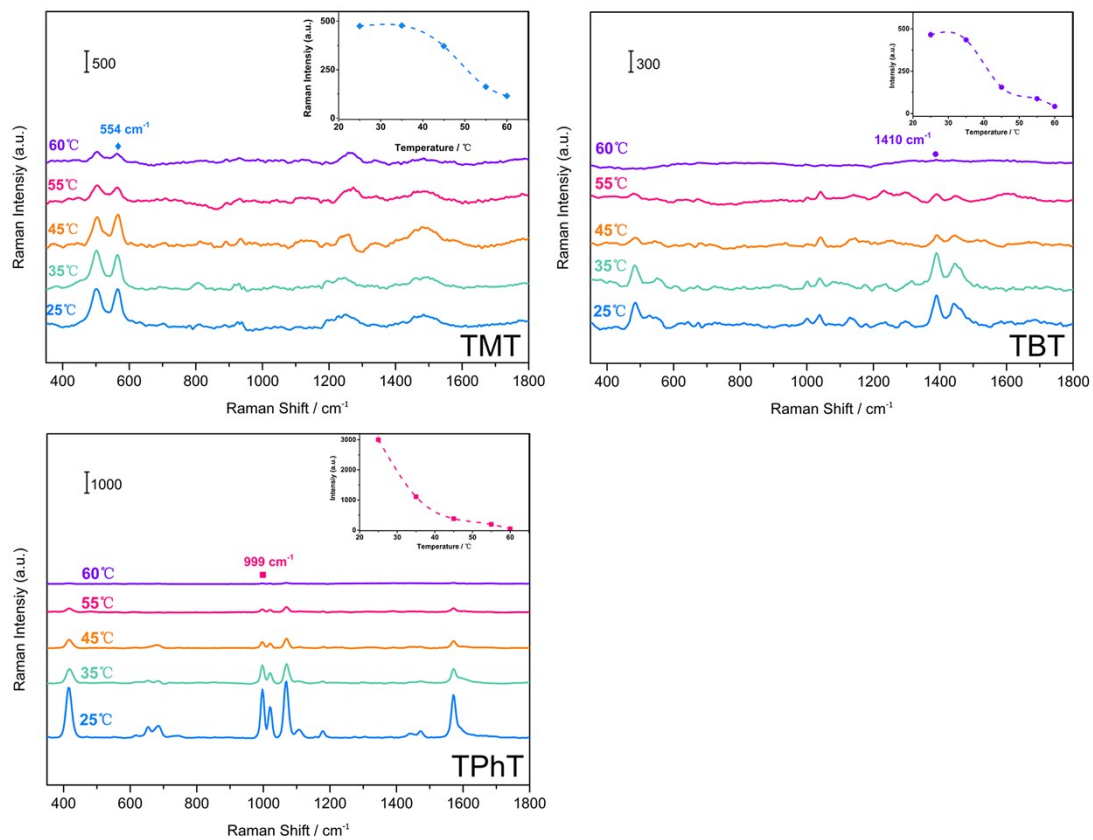

Fig. S6 SERS spectra of OTCs on porous Ag fiber extracted in different temperature, the insert plot is the curve of characteristic bands intensity vs. temperature.

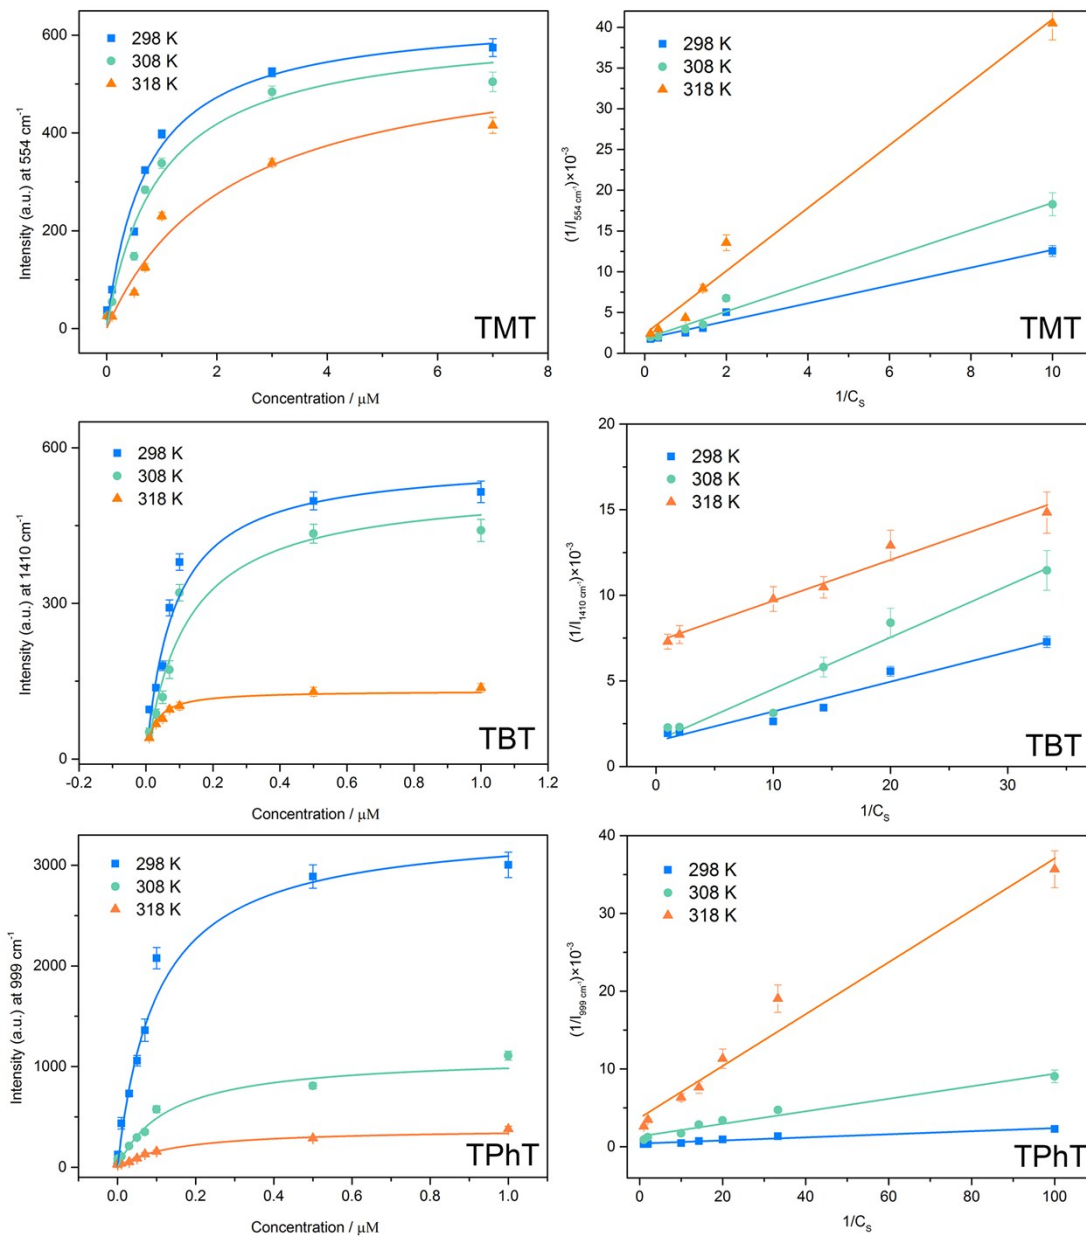

Fig. S7 Adsorption isotherm of OTCs on porous Ag fiber at 209 K (blue), 308 K (cyan) and 318 K (orange). The concentration range: TMT (7.0  $\mu\text{mol/L}$ -10 nmol/L), TBT (1.0  $\mu\text{mol/L}$ -10 nmol/L) and TPhT (1.0  $\mu\text{mol/L}$ -0.1 nmol/L).

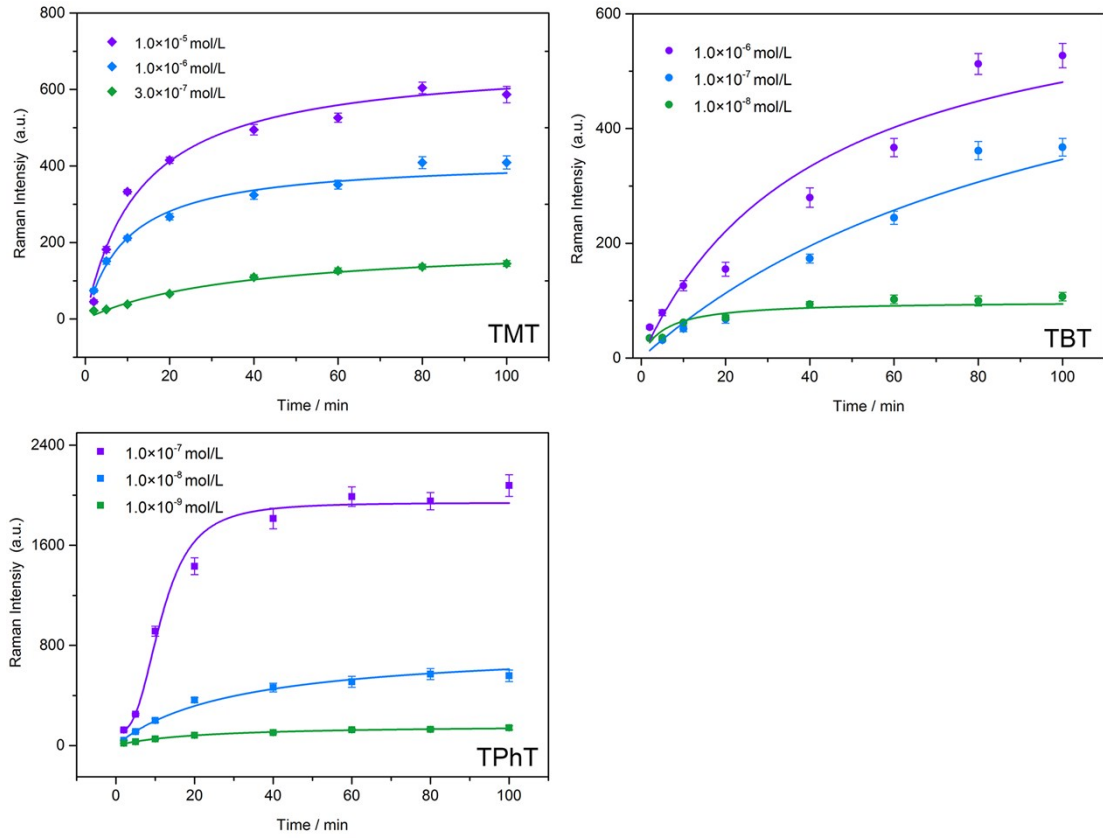

Fig. S8 The kinetic curve of extraction on different concentration

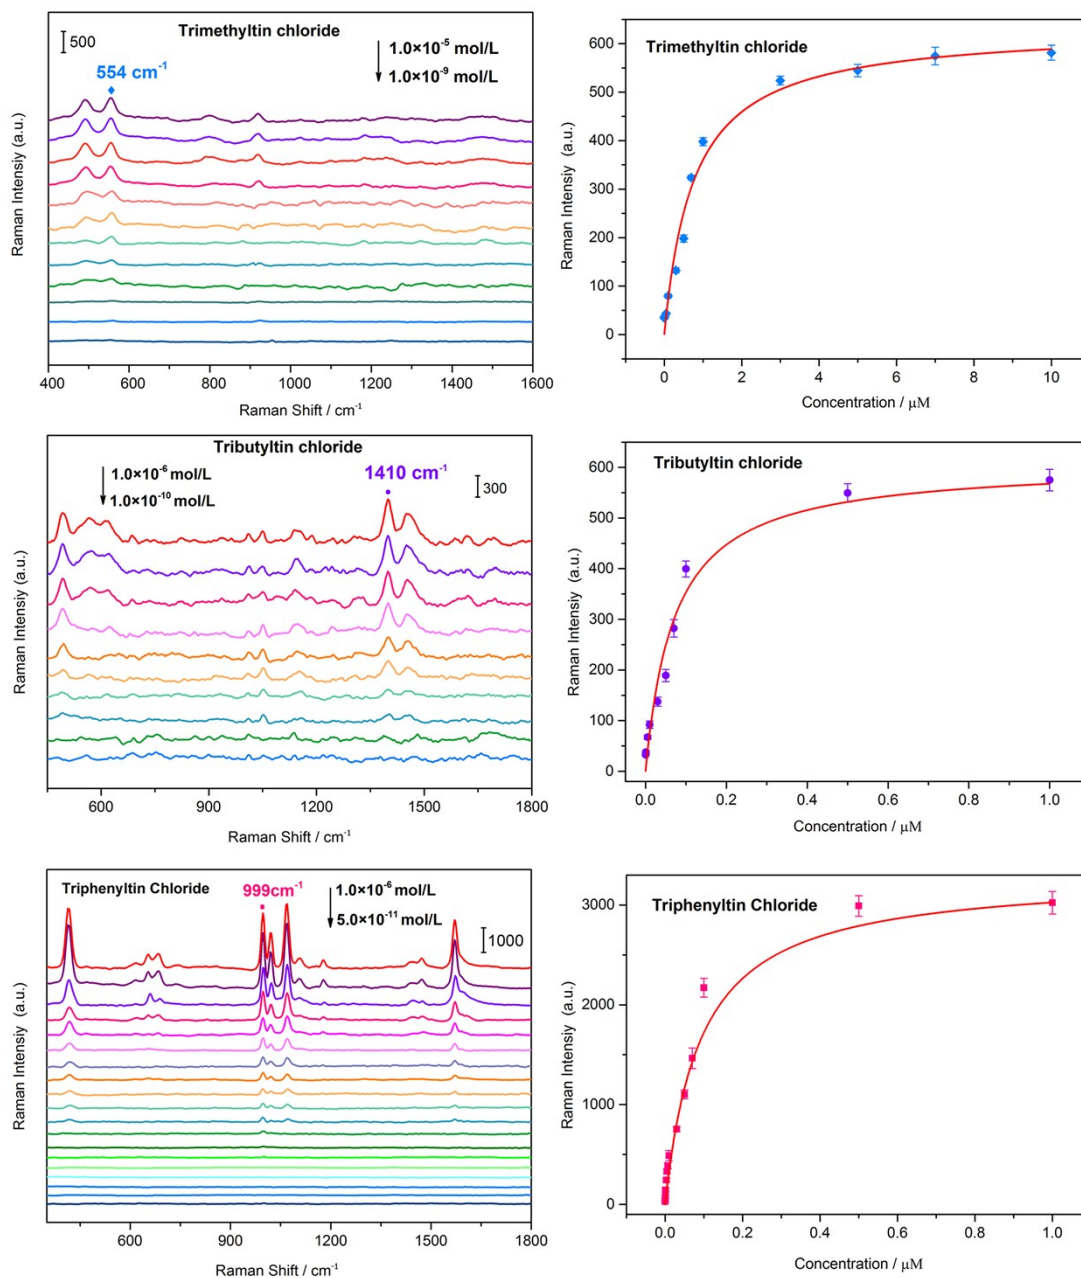

Fig. S9 The SERS spectra and adsorption curve (the intensity of characteristic band vs. the solution concentration) on different concentration, TMT ( $10.0 \mu\text{mol/L}$ - $10 \text{ nmol/L}$ ), TBT ( $1.0 \mu\text{mol/L}$ - $0.1 \text{ nmol/L}$ ) and TPhT ( $1.0 \mu\text{mol/L}$ - $0.05 \text{ nmol/L}$ ), respectively.
